1 **Ageing leads to nonspecific antimicrobial peptide responses in *Drosophila melanogaster***

2

3 Biswajit Shit<sup>1</sup>, Arun Prakash<sup>2,3\*</sup>, Saubhik Sarkar<sup>1</sup>, Pedro F. Vale<sup>2</sup>, Imroze Khan<sup>1\*</sup>

4

5

6 <sup>1</sup>Ashoka University

7 Plot No. 2, Rajiv Gandhi Education City, National Capital Region

8 P.O. Rai, Sonapat, Haryana-131029, India

9

10 <sup>2</sup>Institute of Evolutionary Biology

11 School of Biological Sciences

12 University of Edinburgh, EH9 3FL, UK

13

14 <sup>3</sup>Current address: Vanderbilt University, 465 21<sup>st</sup> Ave S, MRB-III

15 Biological Sciences, Nashville, TN 37212, USA

16

17

18 \*Correspondence

19 [arunpadmaprakash@gmail.com](mailto:arunpadmaprakash@gmail.com)

20 [imroze.khan@ashoka.edu.in](mailto:imroze.khan@ashoka.edu.in)

21

22

23

24

25

26

27

28

29

30 Keywords:

31 Ageing, Antimicrobial peptides, Pathogen resistance, Sexual dimorphism, Immune specificity,

32 Immune senescence

33 **ABSTRACT**

34 Evolutionary theory predicts late-life decline in the force of natural selection, which could  
35 lead to late-life deregulation of immune pathways with increased immunopathological  
36 effects. A potential outcome of such ageing-induced immune deregulation is the inability to  
37 produce specific immune responses against target pathogens. Instead, non-specific responses  
38 would produce an extended set of immune repertoires with little or no fitness benefits, or  
39 even increasing fitness costs. We tested this possibility by using two entomopathogens  
40 *Providencia rettgeri* and *Pseudomonas entomophila* to infect multiple *Drosophila*  
41 *melanogaster* lines with CRISPR/Cas9-induced knockout of either individual or different  
42 combinations of Imd and Toll-inducible antimicrobial peptides (AMPs). As expected, in young  
43 flies, AMPs showed a high degree of non-redundancy and pathogen-specificity such that in  
44 some cases even a single AMP could confer complete resistance. In contrast, ageing led to a  
45 complete loss of specificity, producing complex interactions between multiple AMPs across  
46 Toll and Imd pathways. Moreover, nonspecific responses using diverse AMPs with ageing  
47 either had no survival benefits, or imposed survival costs against *P. rettgeri* and *P.*  
48 *entomophila*. These features of immune senescence were also sexually dimorphic: females  
49 expressed a larger repertoire of AMPs compared to males but extracted equivalent survival  
50 benefits. Finally, age-specific expansion of the AMP pool was associated with several potential  
51 features of a poorly regulated immune system, such as downregulation of negative regulators  
52 of the Imd-pathway (e.g., *caudal* & *pirk*) and a trend of reduced renal function (i.e.,  
53 Malpighian tubule activity), following infection, indicating the risk of increased  
54 immunopathological damage. Taken together, we demonstrate age-dependent changes in  
55 AMP specificity, and how this is associated with variation in immune senescence across sexes  
56 and pathogens.

## 57 INTRODUCTION

58 Ageing often leads to physiological senescence, including immune senescence, characterised  
59 by exaggerated and over-reactive pro-inflammatory responses (Stout-Delgado et al., 2009;  
60 Khan et al., 2017). In several insects (e.g. fruit flies and flour beetles), older individuals show  
61 increased expression of antimicrobial peptides (AMPs) (Zerofsky et al., 2005); higher  
62 haemolymph antibacterial activity or phenoloxidase response (PO) after infection, without  
63 any significant survival benefits (Khan et al., 2016). Instead, increased immunity often induces  
64 lethal immunopathological damage in older individuals, increasing their mortality rate (Khan  
65 et al., 2017; Badinloo et al., 2018). Similar effects are also reported in vertebrates, where an  
66 increase in chronic inflammatory state with age leads to maladaptive impacts of the innate  
67 immune system (Shaw et al., 2013). For example, older mice die faster owing to an elevated  
68 level of interleukin-17 and neutrophil activation, causing hepatocyte necrosis (Stout-Delgado  
69 et al., 2009). By and large, older individuals are thus more likely to experience the detrimental  
70 effects of overactive immunity in both invertebrate and vertebrate species.

71 Age-specific hyper-activation of immunity is consistent with the evolutionary theory of ageing  
72 which predicts a progressive decline in the force of natural selection with age (Williams, 1957;  
73 Hamilton, 1966)— natural selection that optimizes organismal physiology for development  
74 and reproduction early in life, can become too weak to effectively regulate the late-life  
75 performance in older individuals (Maklakov and Chapman, 2019). For example, poor  
76 regulatory mechanisms in several evolutionarily conserved signalling pathways such as  
77 insulin/ insulin-like growth factor signalling can result in suboptimal levels of gene expression  
78 in late life, with myriad negative health effects (Kenyon, 2010; Flatt and Partridge, 2018;  
79 Carlsson et al., 2021). Such changes in conserved signalling pathways might also interfere with

80 the optimal induction and regulation of costly immune pathways in aged individuals. Several  
81 experiments on age-specific changes in the expression of negative regulators of immunity  
82 support this hypothesis (Neves and Sousa-Victor, 2020): e.g., reduced expression of anti-  
83 inflammatory cytokine interleukin-10 not only causes over-activation of cytotoxic  
84 inflammatory pathways in older mice, but also promotes their muscular, cardiovascular and  
85 metabolic dysfunction (Mohanty et al., 2015). In older mice and humans, a rapid age-specific  
86 decline of another immunomodulatory molecule, MANF, increases the levels of pro-  
87 inflammatory cytokines and activated macrophages (Mohanty et al., 2015; Neves et al., 2016).  
88 These changes in immunity and fitness effects are thus an outcome of age-related  
89 malfunctioning of regulatory units of immune pathways.

90 A further potential manifestation of such a deregulated ageing immune system is the  
91 progressive loss of specificity to pathogens. Younger individuals can optimise their immune  
92 responses by acting selectively on pathogens with a limited set of immune effectors (Moret,  
93 2003, Hanson et al. 2019). In contrast, older individuals, owing to their poorly regulated  
94 immunity, might show nonspecific activation of higher number of immune effectors against  
95 an equivalent dose of antigenic exposure. An extended immune repertoire can also  
96 collectively increase the cytotoxicity of immune responses, elevating the risk of morbidity and  
97 mortality with ageing (Khan et al., 2017; Badinloo et al., 2018). Indeed, prior experiments with  
98 older mice showed that pathways leading to increased production of antigen non-specific  
99 antibodies can enhance the risk of autoimmune responses with no improvement in pathogen  
100 clearance ability or survival (Bruce et al., 2009). However, experiments measuring the  
101 functional expansion of the available immune repertoire with ageing and their role in overall  
102 infection outcome is currently missing.

103 In the present work, we tested the impact of ageing on specific interactions between immune  
104 effectors and bacterial infections, using multiple *D. melanogaster* lines where different  
105 combinations of AMPs from the Imd and Toll pathways were knocked out by CRISPR/Cas9  
106 gene editing (Hanson et al., 2019). We targeted AMPs as they have been recently shown to  
107 possess a high degree of non-redundancy, non-interchangeability and specificity against a  
108 range of pathogens in young flies (Hanson et al., 2019). Only a small subset of the total AMP  
109 repertoire provides the most effective protection against specific pathogens so that in some  
110 cases, even a single AMP is sufficient to control the growth of specific pathogens: e.g., Imd-  
111 pathway responsive AMP *Diptericins* (or *Drosocin*) against *Providencia rettgeri* (or  
112 *Enterobacter cloacae*) infection. Such specificity of AMP responses might also indicate  
113 potentially higher adaptive values associated with using fewer immune effectors in young  
114 individuals, thereby, avoiding the net fitness costs of general immune activation (Moret,  
115 2003). Indeed, earlier experiments suggest that toxic levels of AMP expression, due to  
116 suppression of negative immune regulators of Imd-pathway (or increased transcriptional  
117 activation of its positive regulators) in young flies, can lead to reduced lifespan or extensive  
118 neurodegeneration causing faster ageing (Kounatidis et al., 2017). We speculate that the  
119 general loss of regulation in an ageing immune system might also accompany loss of such  
120 controlled specific AMP actions, deploying more AMPs to counter equivalent infection levels,  
121 but without any added survival benefits.

122 In addition, the age-specific role of AMPs can be sex-specific with a strong sex-by-age  
123 interactions (Belmonte et al., 2020). For instance, overexpression of relish or Toll-responsive  
124 defensin can reduce male lifespan more than that of females in *Drosophila* (Badinloo et al.,  
125 2018). Also, previous studies with flies infected with *P. rettgeri* indicated *Drosophila* males

126 had higher *Diptericin* expression (Duneau et al., 2017). A relatively higher expression of  
127 *Diptericin* transcripts in males is perhaps needed to support its exclusive role against *P.*  
128 *rettgeri* infection, whereas low expression in females opens up possibilities where *Diptericin*  
129 is either dispensable or requires compensatory actions of other AMPs. However, there are no  
130 direct experiments to test these possibilities of sex-specific expansion of AMP use.

## 131 MATERIALS AND METHODS

### 132 I. Fly strains and maintenance

133 To test the role of ageing on AMP-driven specific immunity, we used multiple *Drosophila*  
134 *melanogaster* lines where different combinations of multiple and individual AMPs were  
135 knocked out mostly using the CRISPR/Cas9 gene editing or homologous recombination  
136 (details described in Hanson et al., 2019; also see Fig. S1). We used null mutants for 10 of the  
137 14 known *Drosophila* AMPs that are expressed upon systemic infection. These include  
138 mutations from six single gene families including *Defensin* (*Def<sup>SK3</sup>*), *Attacin C* (*AttC<sup>Mi</sup>*), *Attacin*  
139 *D* (*AttD<sup>SK3</sup>*), *Drosocin* (*Dro<sup>SK4</sup>*) *Metchnikowin* (*Mtk<sup>R1</sup>*) and *Drosomycin* (*Drs<sup>R1</sup>*) loci and two small  
140 deletion removing *Diptericins* *DptA* and *DptB* (*Dpt<sup>SK1</sup>*), or the gene cluster containing *Drosocin*  
141 and *Attacins* *AttA* and *AttB* (*Dro-AttAB<sup>SK2</sup>*). The iso-*w<sup>1118</sup>* (DrosDel isogenic) wild-type was used  
142 as the genetic background for mutant isogenization (see Ferreira et al., 2014; Hanson et al.,  
143 2019). We also used ‘ $\Delta$ AMPs’ flies where independent mutations were recombined into a  
144 background lacking 10 inducible AMPs. However, we note that the impact of  $\Delta$ AMPs could be  
145 due to AMPs having specific effects or combinatorial action of multiple co-expressed AMPs.  
146 To tease apart these effects, we also included various combined mutants where different  
147 groups of AMPs were deleted based on the pathways that they are controlled by: (1) Group  
148 B - flies lacking AMPs such as *Drosocin*, *Diptericins* and *Attacins* (*AttC<sup>Mi</sup>*, *AttD<sup>SK1</sup>*, *Dro<sup>SK4</sup>*, *Dro-*  
149 *AttAB<sup>SK2</sup>*) (exclusively regulated by Imd-pathway) (2) Group C - flies lacking the two Toll-  
150 regulated antifungal peptide genes *Metchnikowin* and *Drosomycin* (*Mtk<sup>R1</sup>*; *Drs<sup>R1</sup>*) (mostly  
151 regulated by Toll-pathway). We also referred to flies with single mutations lacking *Defensin*  
152 (*Def<sup>SK3</sup>*) (co-regulated by Imd- and Toll-pathway) as group A. Finally, we also included fly line

153 where group-A, B and C mutants were combined to generate flies lacking AMPs either from  
154 groups A and B (AB), or A and C (AC), or B and C (BC).

155 We maintained all fly stocks and experimental individuals on a standard cornmeal diet also  
156 known as Lewis medium (Siva-Jothy et al., 2018) at a constant temperature of 25°C on a 12 :  
157 12 hour light: dark cycle at 60% humidity. To generate the experimental flies, we reared flies  
158 at a larval density of ~70 eggs/ 6ml food. We collected adult males and females as virgins and  
159 held at a density of 25 flies/sex/food vial for the experiment described below. Female iso-  
160 *w<sup>1118</sup>* flies undergo reproductive senescence within 25 days post-eclosion (Reproductive  
161 output measured for 18-hours; Mean  $\pm$  SE: 3-day-old=  $6.75 \pm 0.77$  vs 24-day-old=  $3.17 \pm 0.53$ ,  
162  $P < 0.001$ ). Hence, in our experiments, we used 3 and 25-day-old individuals (post-eclosion) as  
163 ‘young’ and ‘old’ adults, respectively. We transferred the adults to fresh food vials every 3  
164 days, during the entire experimental window. By screening the single mutants, along with  
165 combined genotypes, we were able to compare the changes in specific immunity as a function  
166 of possible interactions between AMPs of different groups’ vs function of individual AMPs  
167 with ageing.

## 168 II. Infection protocol and the assay for post-infection survival

169 For all the infection, we either used Gram-negative bacteria *Providencia rettgeri* or  
170 *Pseudomonas entomophila*. Both are natural pathogens of *Drosophila* that activate the IMD  
171 pathway (Myllymäki et al., 2014) and could impose significant mortality (Galac and Lazzaro,  
172 2011; Dieppois et al., 2015). To quantify post-infection survivorship, we infected flies (septic  
173 injury method) in the thorax region with a 0.1 mm minuten pin (Fine Science Tools) dipped  
174 into a bacterial suspension made from 5 mL overnight culture (optical density of 0.95,  
175 measured at 600 nm) of either *Providencia rettgeri* or *Pseudomonas entomophila* adjusted to



176 OD of 0.1 and 0.05 respectively. In total, we infected 160-280 flies/sex/infection  
177 treatment/bacterial pathogen/age-group/fly genotypes and then held them in food vials in a  
178 group 20 individuals (For each treatment, sex, age-group, pathogen type, we thus had 8-14  
179 replicate food vials). We carried out sham infection with a pin dipped in sterile phosphate  
180 buffer solution (1xPBS).

181 We then recorded their survival every 4-hours ( $\pm 2$ ) for 5 days. Due to logistical challenges of  
182 handling a large number of flies, we infected each sex and age-groups with *P. rettgeri* (or *P.*  
183 *entomophila*) separately in multiple batches, where they were handled as — (i) Groups AB,  
184 BC, AC; (ii) Group-A, B & C; (iii) Imd-responsive and (iv) Toll-responsive single mutants for *P.*  
185 *rettgeri*; or (i) Groups AB, BC, AC, A, B & C; (ii) Imd-responsive and (iii) Toll-responsive single  
186 mutants for *P. entomophila*. Every time, we also assayed iso-*w*<sup>1118</sup> flies as a control to facilitate  
187 a meaningful comparison across different batches. Therefore, although sexes and age-groups  
188 for each mutant were not directly comparable, their relative effects with respect to control  
189 iso-*w*<sup>1118</sup> were estimated across sexes, age-groups and pathogen types. Note that we  
190 compared each mutant separately with iso-*w*<sup>1118</sup> flies, since we only wanted to capture their  
191 changes in infection susceptibility relative to control flies. For each batch of flies, across  
192 pathogen types, sexes and age-groups, we analysed the survival data with a mixed effects Cox  
193 model, using the R package ‘coxme’ (Therneau, 2015). We specified the model as: survival ~  
194 fly lines (individual AMP mutant lines vs iso-*w*<sup>1118</sup>) + (1|food vials), with fly lines as a fixed  
195 effect and replicate food vials as a random effect. Since none of the fly lines had any mortality  
196 after sham-infection, we were able to quantify the susceptibility of each infected mutant lines  
197 (AMP knockouts) with respect to control flies (iso-*w*<sup>1118</sup> group) as the estimated hazard ratio  
198 of infected AMP mutants versus control flies (hazard ratio = rate of deaths occurring in

199 infected AMP mutants /rate of deaths occurring in iso-*w*<sup>1118</sup> group). A hazard ratio  
200 significantly greater than one indicated a higher risk of mortality in the AMP mutant  
201 individuals.

202 Note that the above experimental design allowed us to repeat the assay for post-infection  
203 survival of young and old iso-*w*<sup>1118</sup> flies infected with *P. rettgeri* (or *P. entomophila*) in 4 (or 3)  
204 independently replicated experiments. We thus estimated the effects of ageing on their post-  
205 infection survival, using a mixed effects Cox model specified as: survival ~ age + (1 | food vials),  
206 with age as a fixed effect, and food vials as random effects.

### 207 III. Assay for bacterial clearance

208 Mortality of control flies (iso-*w*<sup>1118</sup>) injected with the experimental infection dose began  
209 around 24-hours and 20-hours after infection with *P. rettgeri* and *P. entomophila* respectively  
210 (Fig. S2A). We therefore used these time-points to estimate the bacterial load across the age-  
211 groups as a measure of the pathogen clearance ability across AMPs. We homogenized flies in  
212 a group of 6 in the sterile PBS (n= 8-15 replicate groups/sex/treatment/age-group/fly lines),  
213 followed by plating them on Luria agar. Due to logistical challenges with large number of  
214 experimental flies, we handled each sex, age-group and pathogen type separately and in  
215 multiple batches as described above (see method section-ii).

216 Also, similar to post-infection survival data, we were only interested in comparing the changes  
217 in bacterial load for each mutant line relative to control iso-*w*<sup>1118</sup> flies across experimental  
218 groups. We thus analysed the bacterial load data of each mutant genotype with iso-*w*<sup>1118</sup> flies  
219 separately across age-groups, sexes and pathogen types. Since residuals of bacterial load data  
220 were non-normally distributed (confirmed using Shapiro-Wilks's test), we log-transformed

221 the data, but residuals were still non-normally distributed. Subsequently, we analysed the  
222 log-transformed data, using a generalised linear model best fitted to gamma distribution, with  
223 fly lines (i.e., control iso- $w^{1118}$  line vs individual AMP knockout line) as a fixed effect.

224 IV. Assay for the Malpighian tubule activity, as a proxy for immunopathological  
225 damage

226 Malpighian tubules (MTs), the fluid-transporting excretory epithelium in all insects, are prone  
227 to increased immunopathology following an immune activation due to their position in the  
228 body and the fact that they cannot be protected with an impermeable membrane due to their  
229 functional requirement (Dow et al., 1994; Khan et al., 2017). Previous experiments have  
230 shown that risk of such immunopathological damage can increase further with ageing in  
231 mealworm beetle *Tenebrio molitor* (Khan et al., 2017). It is possible that nonspecific AMP  
232 responses with ageing in *Drosophila* was also associated with increased immunopathological  
233 damage to MTs. We thus estimated the fluid transporting capacity of MTs dissected from  
234 experimental females at 3-hours after immune challenge with 0.1 OD *P. rettgeri* (n=15  
235 females/ infection treatment/age-group), using a modified ‘oil drop’ technique as outlined by  
236 (Dow et al. 1994; Li et al., 2020) (also see SI methods section-iii).

237 This method provides a functional estimate of their physiological capacity by assaying the  
238 ability to transport saline across the active cell wall into the tubule lumen. The volume of the  
239 secreted saline droplet is negatively correlated with the level of immunopathological damage  
240 to MTs. Since the data was not normally distributed, we analysed the MT activity data as a  
241 function of infection status for each age-group separately, using a non-parametric Kruskal-  
242 Wallis test.

243 V. Gene expression assay

244 Finally, we note that transcription of negative regulators of Imd-pathway such as *pirk* and  
245 *caudal* are important to ensure an appropriate level of immune response following infection  
246 with gram-negative bacterial pathogens, thereby avoiding the immunopathological effects  
247 (Lee and Ferrandon, 2011; Kleino and Silverman, 2014). While *pirk* interferes with the  
248 interaction of *PGRP-LC* and *-LE* with the molecule Imd to limit the activation of the Imd  
249 pathway, *caudal* downregulates the expression of AMPs (Lee and Ferrandon, 2011). To  
250 examine whether non-specific expansion of AMP repertoire was associated with the lower  
251 expression of these negative regulators, we estimated their relative expression level in both  
252 young and old iso-*w*<sup>1118</sup> individuals infected with *P. rettgeri* at 24 hours post-infection, by  
253 using qPCR (as outlined in Prakash et al., 2021) (n= Total 15-21 flies in a group of 3  
254 homogenized in Trizol reagent/ Infection treatment/ age-group and sex-combination).

255 In addition, we also estimated the expression of the Imd-pathway NF-κB transcription factor  
256 *Relish* and peptidoglycan recognition protein - *PGRP-LC*, both act as positive regulators of Imd-  
257 pathway (Lemaitre and Hoffmann, 2007; Myllymäki et al., 2014) and hence, can serve as a  
258 proxy for overactivated Imd pathway and higher AMP expression in older flies (Badinloo et  
259 al., 2018) (also see SI methods). We analysed the gene expression data using ANOVA (see SI  
260 methods section-iv for details).

## 261 RESULTS

262 We began our observation with high mortality and increased bacterial load in AMP-deficient  
263 flies ( $\Delta$ AMPs) infected with *P. rettgeri*, regardless of their sex and age (Fig. 1A, 1B, 1E, 1F;  
264 Table S2, S3), suggesting that AMPs are critically important to prevent pathogen growth,  
265 thereby increasing the post-infection survival costs (Fig. 1A, 1B, 1E, 1F; Fig. S3, S4; Table S2,  
266 S3). Older iso-*w*<sup>1118</sup> control females infected with *P. rettgeri* also showed higher mortality (Fig.  
267 S2A, S2B; Table S4A) and increased bacterial load (Fig. S2C, Table S4B) than their younger  
268 counterparts, suggesting negative effects of ageing on fitness and pathogen clearance ability.  
269 By contrast, both young and old males had similar post-infection mortality rate (Fig. S2A, S2B;  
270 Table S4A) with comparable bacterial load (Fig. S2C; Table S4B), indicating that ageing did not  
271 impact male's ability to survive post-infection and clear pathogens, at least at the infection  
272 dose used in our experiments. Nevertheless, in the subsequent assays, these results from  
273 male flies infected with *P. rettgeri* enabled us to directly compare the relative effects of  
274 deleting different Imd- vs Toll-responsive AMPs across age-groups (against a common  
275 baseline).

### 276 I. Ageing leads to an expansion of the required AMP repertoire against *P. rettgeri* 277 infection

278 To gain a broad understanding of how AMP specificity changes with age, we first tested  
279 mutants lacking different groups of AMPs either from Imd- (e.g., group B) or Toll-pathways  
280 (e.g., group C) (pathway-specific), or combined mutants lacking pathway-specific mutants in  
281 different combinations (e.g., group AB, BC or AC) (See Fig. S1 for description of mutants). As  
282 reported in a previous study by Hanson and co-workers (Hanson et al., 2019), young males  
283 lacking group-AB and -BC AMPs were highly susceptible to *P. rettgeri* infection (Fig. 1A; Table

284 S2), and this was generally associated with 10-100-fold increased bacterial loads in these  
285 mutants relative to the iso-*w*<sup>1118</sup> control (Fig. 1B; Table S3). Subsequent assays with pathway-  
286 specific (i.e., Imd- or Toll-pathway) AMP combinations (group A, B or C) confirmed that such  
287 effects were primarily driven by Imd-regulated group-B AMPs that were shared between both  
288 AB and BC combinations (Fig. 1C; Fig. S3; Table S2), and equally driven by increased bacterial  
289 load (Fig. 1D; Table S3). We found a comparable pattern in young females as well, except that  
290 flies lacking group BC combinations of AMPs were not negatively affected by infection (Fig.  
291 1E, 1F, 1G, 1H; Fig. S4; Table S2, S3).

292 In contrast to young flies, most of the pathway-specific or combined mutants became highly  
293 susceptible to *P. rettgeri* infection with age, except females of group-A mutants flies lacking  
294 *Def*. This would suggest a possible sexually dimorphic effect of *Defensin* in *P. rettgeri* infection,  
295 which appear to be important for males, but not females (Fig. 1C, 1G; Fig. S3, S4; Table S2).  
296 Regardless of this slight variation across sexes, our results clearly demonstrated that only  
297 having functional Imd-regulated group-B AMPs was not sufficient to protect older flies against  
298 *P. rettgeri* infection. Also, these results indicated that a single AMP *Dpt*-driven protection  
299 against *P. rettgeri* infection, as suggested by Hanson et al. (2019), may not be applicable to  
300 older flies (also see Unckless et al., 2016). High susceptibility of older mutants lacking group  
301 A or C AMPs (Fig. 1C, 1G; Table S2) and increased bacterial growth (Fig. 1D, 1H; Table S3)  
302 therein clearly indicated that other AMPs responsive to Gram-positive bacteria (e.g., *Def*) or  
303 fungal pathogens (e.g., *Mtk*, *Drs*) might be needed as well.

## 304 II. ***Dpt*-specificity against *P. rettgeri* infection is sex-specific and disappears with age**

305 Next, we decided to test the role of individual AMPs deleted in the pathway-specific or  
306 compound mutants across age-groups and sexes. Interestingly, *Dpt* provided complete

307 protection against *P. rettgeri* only in young males, but not in females or older males (Fig. 2A,  
308 2E; Table S5). This was verified by using fly lines where *DptA* and *DptB* are introduced on an  
309 AMP-deficient background ( $\Delta AMPs^{+Dpt}$ ). *Dpt* reintroduction could fully restore survival as that  
310 of wild-type flies only in young males, and this was associated with a decrease in CFUs  
311 compared to the *Dpt* deletion mutant (Fig. 2B, Table S6). However, reintroduction of  
312 functional *DptA* and *DptB* ( $\Delta AMPs^{+Dpt}$ ) in young or old females flies did not result in lower  
313 CFUs (Fig. 2F; Table S6) and these flies remained highly susceptible to *P. rettgeri* (Fig. 2E; Table  
314 S2). Young (or old) females also showed increased bacterial loads and associated higher  
315 susceptibility when other Imd-regulated group-B AMPs such as *AttC* and *Dro-Att* (or *Dro* and  
316 *Dro-Att* in old females) were deleted (Fig. 2E, 2F; Table S5, S6). Older females lacking *AttC*  
317 showed increased infection susceptibility as well, but did not have increased bacterial load  
318 (Fig. 2E, 2F; Table S5, S6). Older  $\Delta AMPs^{+Dpt}$  males, on the other hand, could limit the bacterial  
319 burden as low as that of the control iso-*w*<sup>1118</sup> flies (Fig. 2B; Table S6), but still showed very  
320 high post-infection mortality (Fig. 2A; Table S5). These results from older males thus  
321 suggested that the ability to clear pathogens might not always translate into an improved  
322 ability to survive after infection (Fig. 2A, 2B; Table S5, S6).

323 Why did females always require AMPs other than *Dpt* after *P. rettgeri* infection? Although the  
324 mechanisms behind sex-specific expansion of AMP repertoire are unknown, a possible  
325 explanation is that females show inherently lower expression level of *Dpt* relative to males .  
326 Consequently, they may require the joint expression of other AMPs to complement the lower  
327 *Dpt* expression, thereby enhancing the protection against *P. rettgeri* infection. Indeed, a  
328 previous study has already demonstrated lower *Dpt* expression in iso-*w*<sup>1118</sup> females than  
329 males after *P. rettgeri* infection (see Duneau et al., 2017), although the causal link between

330 reduced *Dpt* expression and proportional increase in the compensatory action of other AMPs  
331 is not yet experimentally validated.

332 Also, both males and females showed further extension to a Toll-responsive AMP repertoire  
333 with ageing. In addition to the role of *Def* (included in group-A) as described above in older  
334 males (but not in older females; compare Fig. 1D, 1H; Table S3), older flies of both sexes also  
335 showed increased microbe loads and increased mortality when Toll-regulated AMPs from  
336 such as *Drs* and *Mtk* were deleted (Fig. 2D, 2H; Table S6), raising a possibility of crosstalk  
337 between Toll and Imd immune-signalling pathways (Duneau et al., 2017; Nishide et al., 2019).  
338 Taken together, these results describe ageing as a major driver behind the loss of specificity  
339 of AMP responses.

340 Additionally, we also note that a few other mutations such as deletion of *Dro* and *Dro-Att*,  
341 which otherwise had no effects on the survival of *P. rettgeri*-infected young males, caused  
342 significant increase in the bacterial load (Fig. 2A, 2B; Table S5, S6). Together, these results not  
343 only underscored the multifaceted role of AMPs, but also provided functional resolution at  
344 the level of single AMPs such as *Dpt* which in addition to playing the canonical role in resisting  
345 the infection, also aided in withstanding the effects of increased pathogen growth, caused by  
346 the dysfunction of other AMPs (Fig. 2A, 2B; Table S5, S6).

347 **III. Expansion of the required AMP repertoire does not improve, and even reduces,**  
348 **survival in both older males and females infected with *P. entomophila***

349 To test if age-related loss of AMP specificity was specific to *P. rettgeri*, or also occurred with  
350 other infections, we investigated the AMP repertoire in young and old flies infected with the  
351 Gram-negative bacteria *P. entomophila*. Similarly, older flies required a larger repertoire of



352 AMPs (Fig. 3A, 3C; Table S7) and yet, died faster than young flies (old vs young: 4-fold vs 2-  
353 fold; Fig. 3A, 3C). In contrast to younger flies, where only group-B, -AB and -BC mutants were  
354 susceptible to *P. entomophila* infection, all the other pathway-specific or combined mutants  
355 of older males and females were also highly sensitive to infection (Fig. 3A, 3C; Table S7).  
356 However, further experiments with single AMP mutants revealed that the antibacterial  
357 protection in both young males and females was still limited only to the exclusively Imd-  
358 regulated group-B AMPs, where several of them individually caused significant increase in  
359 microbe loads and reduction in post-infection survival (Fig. 4A, 4B, 4E, 4F; Table S9, S10). In  
360 contrast, older flies also needed additional action of Toll-regulated AMP *Drs* (Fig. 4C, 4G; Table  
361 S9), though it is striking that that increased mortality was not associated with increased  
362 microbe loads relative to *iso-w<sup>1118</sup>* in this case (Fig. 4D, 4H; Table S10). Overall, this is  
363 comparable to *P. rettgeri* infection where potential crosstalk between Toll & Imd immune-  
364 signalling pathways has already been implicated with ageing (Fig. 2; Table S5, S6). Also, the  
365 broad similarity between age-specific expansion and cross-reactivity of AMP repertoire  
366 against two different pathogens indicated the possibility where non-specificity can indeed be  
367 a generalised feature of an ageing immunity. Moreover, the increased mortality in older flies  
368 infected with *P. entomophila*, despite involving a higher number of AMPs, was perhaps an  
369 indication of their exacerbated cytotoxic effects with age (Badinloo et al., 2018).

370 **IV. Ageing-induced expansion of the required AMP repertoire was associated with**  
371 **downregulation of negative immune regulators and a trend of reduced renal**  
372 **purging post-infection**

373 The expansion of the AMP repertoire in older flies could reflect a compensatory action to  
374 balance the lower per capita efficiency of their individual AMPs. This would enable flies to

375 maintain an equivalent post-infection survival as that of younger flies against similar infection  
376 dose (e.g., old vs young males infected with *P. rettgeri*; Fig. 1A; Table S2). However, any  
377 benefits of recruiting multiple AMPs, may have been outweighed by the costs of expressing  
378 them (suggested in Badinloo et al., 2018) as higher immune activity, in general, accelerates  
379 the ageing process by imposing immunopathological damage to vital organs such as  
380 Malpighian tubules (MTs) (Khan et al., 2017). We expected that expansion of the AMP  
381 repertoire might have similar consequences in our experimental older flies as well. This is  
382 closely reflected by our results where *P. rettgeri* infection produced a trend of reduced renal  
383 function in older females (Mean  $\pm$  SE: Sham-infected- 0.097 vs Infected- 0.034;  $p=0.07$ ,  
384 marginally non-significant), measured as MT secretion (Fig. 5A; Table S11). Since functional  
385 MTs are needed to purge excessive ROS produced during immune responses as a  
386 physiological adaptation to prevent tissue damage in *Drosophila* (Li et al., 2020), reduced MT  
387 activity might not only exacerbates the effects of pathogenic infection, but can also causes  
388 late-life costs (Khan et al., 2017).

389 Finally, we also found ageing-associated downregulation of the major negative regulators of  
390 Imd-signalling such as *Caudal* & *Pirk* in older flies (Fig. 5B; Table S12), which has been  
391 previously linked to the production of toxic levels of AMP production, causing reduced  
392 lifespan, locomotor defects and extensive neurodegeneration (Kounatidis et al., 2017;  
393 Prakash et al., 2021). Based on these results, we speculate that the observed expansion of  
394 AMP repertoire with age is therefore most likely to represent suboptimal body condition,  
395 characterized by poorly regulated immune system and increased physiological costs.

## 396 Discussion

397 Recent studies performed functional validation of *Drosophila* AMPs, revealing remarkable  
398 specificity and non-redundant interactions with subsets of pathogens that they target  
399 (Hanson et al., 2019). In the present work, we analysed these specific AMPs responses  
400 primarily as a function of ageing that alters the regulation and relative investment in immune  
401 responses (Khan et al., 2016, 2017). We used two bacterial entomopathogen *P. rettgeri* and  
402 *P. entomophila* to induce various level of AMP responses inside a fly host, ranging from a  
403 single AMP to pathway-specific expression [e.g., Imd vs Toll; (Hanson et al., 2019)]. Further,  
404 although sex profoundly impacts the relative use of AMPs (Duneau et al., 2017), previous  
405 studies addressing AMP specificity have almost entirely focussed on males (Unckless et al.,  
406 2016; Hanson et al., 2019). We thus also included both males and females in our experiments  
407 to test the sex-specific effect of ageing on AMP functions. In fact, we showed that the  
408 efficiency of these AMP responses is strictly age-driven with high degree of sexual  
409 dimorphism. For example, the classic *Dpt*-driven protection against *P. rettgeri*, as shown by  
410 previous studies (Hanson et al., 2019), is only limited to young males, whereas females also  
411 needed other Imd-regulated AMPs. Although the reason is unclear, we speculate that  
412 multiple AMPs were needed possibly to compensate the inherently lower expression level of  
413 *Dpt* transcript in females than males (Duneau et al., 2017; also shown by Prakash, 2022).  
414 However, regardless of sex and pathogen, ageing led to a more drastic expansion of AMP  
415 repertoire— instead of deploying only canonical expression of Imd-responsive AMPs to  
416 counter Gram-negative bacterial infections, older males and females also used AMPs from  
417 Toll pathways.

418 Surprisingly, despite using more diverse AMPs, late-life expansion either did not confer any  
419 survival benefits (during *P. rettgeri* infection in older males) or was associated with survival  
420 costs (after *P. entomophila* infection). We thus speculate that the nonspecific use of AMPs  
421 with ageing was unnecessary, perhaps indicating an immune system failing to control over-  
422 reactive immune responses with potentially immunopathological effects (Stout-Delgado et  
423 al., 2009; Goldstein, 2010; Khan et al., 2017; Badinloo et al., 2018). This notion was further  
424 supported by reduced expression levels of negative regulators of immune responses such as  
425 *caudal* and *pirk* in older flies, which have been previously implicated in over-activating Imd-  
426 signalling and AMP expression. In addition, a trend of reduced renal function or Malpighian  
427 tubule activity in infected older flies suggested that expanded AMP repertoire might not be  
428 able to prevent the plausible physiological costs of bacterial infection. Although not verified  
429 experimentally, we suspect a causal role of overactivated AMPs here. This is because (a)  
430 overactive and simultaneously expressed multiple AMPs can impose cytotoxic effects  
431 (Badinloo et al., 2018), and (b) reduced Malpighian tubule activity is already a known  
432 manifestation of immunopathological costs caused by overactive insect immune components  
433 (Sadd and Siva-Jothy, 2006; Khan et al., 2017), reducing fitness by accumulating toxic  
434 metabolites (Li et al., 2020).

435 We also note an alternative possibility where age-specific increase in AMP expression could  
436 have been beneficial. For example, since ageing can lead to accumulation of diverse microbes  
437 in the body cavity (Ren et al., 2007; Arias-Rojas and Iatsenko, 2022), this might warrant the  
438 overexpression of multiple AMPs to tackle the antigenic diversity of many microbial species  
439 to maintain the health (Ren et al., 2007; Badinloo et al., 2018). Indeed, previous experiments  
440 have found that highly expressed Imd-responsive AMPs such as *CecA1* and *Dro* were needed

441 to maintain health while extending the lifespan in *Drosophila* (Loch et al., 2017). However,  
442 benefits of non-specific, highly expressed immune responses may still not be able to outweigh  
443 the net costs of overreactive immune responses. In fact, detrimental effects of overreactive  
444 immunity with ageing has been supported by recent analyses linking weaker strength of  
445 purifying selection in older individuals and high frequency of non-synonymous and disease-  
446 causing mutations (Cheng and Kirkpatrick, 2021). This in turn can lead to poorly-regulated  
447 gene expression network in older animals with increased cancer risk in a range of species,  
448 including humans. Taken together, non-specific AMP responses with ageing is thus a more  
449 likely feature of a deregulated immune system of older individuals (Kounatidis et al., 2017).

450 Finally, the use of diverse array of AMP deletion mutants allowed us to capture enormous  
451 functional diversity of AMPs, revealing dynamic age- and sex-specific changes in their  
452 pathogen clearance ability. Older individuals showed increased divergence between  
453 individual AMPs vs their combined action (e.g., *Dpt* vs group-B mutants in older females),  
454 possibly indicating greater complexity associated with higher number of AMPs in use vs their  
455 various interactions. Although we did not find much evidence of synergism or additive effects  
456 between individual AMPs (but see the older males infected with *P. entomophila*),  
457 indispensability of each AMPs to maintain the fitness post-infection in older flies suggested  
458 the mutually non-exclusive and intertwined nature of their activity with ageing. We hope that  
459 these results will motivate future studies to investigate the deeper mechanistic details of  
460 nonspecific AMP function with ageing. Also, with growing importance of AMPs in developing  
461 novel antibiotics and autoimmune disease research, identifying age or sex as major sources  
462 of variability in AMP functions and fitness impacts might have significant importance for  
463 therapeutic and gerontological research.

464 **Acknowledgements**

465 We thank Basabi Bagchi, Joy Bose, and Srijan Seal for feedback on the manuscript. We are  
466 grateful to Bruno Lemaitre and Mark A. Hanson for generously providing us the fly lines. We  
467 thank Srijan Seal, Katy M. Monteith, Raghav Pavan Thunga and Devshuvam Banerji for  
468 laboratory assistance.

469 **Author contribution**

470 IK conceived the experiments; IK, AP, BS designed the experiments; BS, AP and SS performed  
471 the experiments; AP, BS and IK analysed the data; IK and PV acquired the funding and  
472 provided resources and consumables. IK and AP drafted the manuscript with additional input  
473 and comments from BS, SS and PV. All authors agreed on the final version of the manuscript.

474 **Funding**

475 We thank the grant supplement from SERB-DST India (No. ECR/2017/003370) to I. Khan and,  
476 Ashoka University for supporting this research. The research was also funded by a Society in  
477 Science Branco Weiss fellowship and a Chancellor's Fellowship (University of Edinburgh) both  
478 awarded to P. Vale. A. Prakash was funded by a Darwin Trust PhD Studentship (U. Edinburgh).  
479

480 **Competing interest**

481 None

## 482 References

- 483 Arias-Rojas, A., Iatsenko, I., 2022. The Role of Microbiota in *Drosophila melanogaster* Aging.  
484 *Frontiers in Aging 3*.
- 485 Badinloo, M., Nguyen, E., Suh, W., Alzahrani, F., Castellanos, J., Klichko, V.I., Orr, W.C.,  
486 Radyuk, S.N., 2018. Overexpression of antimicrobial peptides contributes to aging  
487 through cytotoxic effects in *Drosophila* tissues. *Arch. Insect Biochem. Physiol.* 98,  
488 e21464. <https://doi.org/10.1002/arch.21464>
- 489 Belmonte, R.L., Corbally, M.-K., Duneau, D.F., Regan, J.C., 2020. Sexual Dimorphisms in  
490 Innate Immunity and Responses to Infection in *Drosophila melanogaster*. *Front.*  
491 *Immunol.* 10, 3075. <https://doi.org/10.3389/fimmu.2019.03075>
- 492 Bruce, D., Whitcomb, J.P., August, A., McDowell, M.A., Cantorna, M.T., 2009. Elevated non-  
493 specific immunity and normal *Listeria* clearance in young and old vitamin D receptor  
494 knockout mice. *International Immunology* 21, 113–122.  
495 <https://doi.org/10.1093/intimm/dxn129>
- 496 Carlsson, H., Ivimey-Cook, E., Duxbury, E.M.L., Edden, N., Sales, K., Maklakov, A.A., 2021.  
497 Ageing as “early-life inertia”: Disentangling life-history trade-offs along a lifetime of  
498 an individual. *Evolution Letters* 5, 551–564. <https://doi.org/10.1002/evl3.254>
- 499 Cheng, C., Kirkpatrick, M., 2021. Molecular evolution and the decline of purifying selection  
500 with age. *Nat Commun* 12, 2657. <https://doi.org/10.1038/s41467-021-22981-9>
- 501 Dieppois, G., Opota, O., Lalucat, J., Lemaitre, B., 2015. *Pseudomonas entomophila*: A  
502 Versatile Bacterium with Entomopathogenic Properties, in: Ramos, J.-L., Goldberg,  
503 J.B., Filloux, A. (Eds.), *Pseudomonas*. Springer Netherlands, Dordrecht, pp. 25–49.  
504 [https://doi.org/10.1007/978-94-017-9555-5\\_2](https://doi.org/10.1007/978-94-017-9555-5_2)
- 505 Dow, J.A.T., Maddrell, S.H.P., Görtz, A., Skaer, N.J.V., Brogan, S., Kaiser, K., 1994. The  
506 malpighian tubules of *Drosophila melanogaster*: a novel phenotype for studies of  
507 fluid secretion and its control. *J. exp. Biol.* 197, 421–428.
- 508 Duneau, D.F., Kondolf, H.C., Im, J.H., Ortiz, G.A., Chow, C., Fox, M.A., Eugénio, A.T., Revah, J.,  
509 Buchon, N., Lazzaro, B.P., 2017. The Toll pathway underlies host sexual dimorphism  
510 in resistance to both Gram-negative and Gram-positive bacteria in mated  
511 *Drosophila*. *BMC Biol* 15, 124. <https://doi.org/10.1186/s12915-017-0466-3>
- 512 Ferreira, Á.G., Naylor, H., Esteves, S.S., Pais, I.S., Martins, N.E., Teixeira, L., 2014. The Toll-  
513 Dorsal Pathway Is Required for Resistance to Viral Oral Infection in *Drosophila*. *PLOS*  
514 *Pathogens* 10, e1004507. <https://doi.org/10.1371/journal.ppat.1004507>
- 515 Flatt, T., Partridge, L., 2018. Horizons in the evolution of aging. *BMC Biology* 16, 93.  
516 <https://doi.org/10.1186/s12915-018-0562-z>
- 517 Galac, M.R., Lazzaro, B.P., 2011. Comparative pathology of bacteria in the genus *Providencia*  
518 to a natural host, *Drosophila melanogaster*. *Microbes and Infection* 13, 673–683.  
519 <https://doi.org/10.1016/j.micinf.2011.02.005>
- 520 Goldstein, D.R., 2010. Aging, imbalanced inflammation and viral infection. *Virulence* 1, 295–  
521 298. <https://doi.org/10.4161/viru.1.4.12009>
- 522 Hamilton, W.D., 1966. The moulding of senescence by natural selection. *Journal of*  
523 *Theoretical Biology* 12, 12–45. [https://doi.org/10.1016/0022-5193\(66\)90184-6](https://doi.org/10.1016/0022-5193(66)90184-6)
- 524 Hanson, M.A., Dostálová, A., Ceroni, C., Poidevin, M., Kondo, S., Lemaitre, B., 2019. Synergy  
525 and remarkable specificity of antimicrobial peptides in vivo using a systematic  
526 knockout approach. *eLife* 8, e44341. <https://doi.org/10.7554/eLife.44341>

- 527 Kenyon, C.J., 2010. The genetics of ageing. *Nature* 464, 504–512.  
528 <https://doi.org/10.1038/nature08980>
- 529 Khan, I., Agashe, D., Rolff, J., 2017. Early-life inflammation, immune response and ageing.  
530 *Proc. R. Soc. B.* 284, 20170125. <https://doi.org/10.1098/rspb.2017.0125>
- 531 Khan, I., Prakash, A., Agashe, D., 2016. Immunosenescence and the ability to survive  
532 bacterial infection in the red flour beetle *Tribolium castaneum*. *Journal of Animal*  
533 *Ecology* 85, 291–301. <https://doi.org/10.1111/1365-2656.12433>
- 534 Kleino, A., Silverman, N., 2014. The *Drosophila* IMD pathway in the activation of the  
535 humoral immune response. *Developmental & Comparative Immunology* 42, 25–35.  
536 <https://doi.org/10.1016/j.dci.2013.05.014>
- 537 Kounatidis, I., Chtarbanova, S., Cao, Y., Hayne, M., Jayanth, D., Ganetzky, B., Ligoxygakis, P.,  
538 2017. NF- $\kappa$ B Immunity in the Brain Determines Fly Lifespan in Healthy Aging and  
539 Age-Related Neurodegeneration. *Cell Reports* 19, 836–848.  
540 <https://doi.org/10.1016/j.celrep.2017.04.007>
- 541 Lee, K.-Z., Ferrandon, D., 2011. Negative regulation of immune responses on the fly:  
542 Immune responses on the fly. *The EMBO Journal* 30, 988–990.  
543 <https://doi.org/10.1038/emboj.2011.47>
- 544 Li, X., Rommelaere, S., Kondo, S., Lemaitre, B., 2020. Renal Purge of Hemolymphatic Lipids  
545 Prevents the Accumulation of ROS-Induced Inflammatory Oxidized Lipids and  
546 Protects *Drosophila* from Tissue Damage. *Immunity* 52, 374–387.e6.  
547 <https://doi.org/10.1016/j.immuni.2020.01.008>
- 548 Loch, G., Zinke, I., Mori, T., Carrera, P., Schroer, J., Takeyama, H., Hoch, M., 2017.  
549 Antimicrobial peptides extend lifespan in *Drosophila*. *PLoS ONE* 12, e0176689.  
550 <https://doi.org/10.1371/journal.pone.0176689>
- 551 Maklakov, A.A., Chapman, T., 2019. Evolution of ageing as a tangle of trade-offs: energy  
552 versus function. *Proceedings of the Royal Society B: Biological Sciences* 286,  
553 20191604. <https://doi.org/10.1098/rspb.2019.1604>
- 554 Mohanty, S., Joshi, S.R., Ueda, I., Wilson, J., Blevins, T.P., Siconolfi, B., Meng, H., Devine, L.,  
555 Raddassi, K., Tsang, S., Belshe, R.B., Hafler, D.A., Kaech, S.M., Kleinstein, S.H.,  
556 Trentalange, M., Allore, H.G., Shaw, A.C., 2015. Prolonged Proinflammatory Cytokine  
557 Production in Monocytes Modulated by Interleukin 10 After Influenza Vaccination in  
558 Older Adults. *The Journal of Infectious Diseases* 211, 1174–1184.  
559 <https://doi.org/10.1093/infdis/jiu573>
- 560 Moret, Y., 2003. Explaining variable costs of the immune response: selection for specific  
561 versus non-specific immunity and facultative life history change. *Oikos* 102, 213–216.  
562 <https://doi.org/10.1034/j.1600-0706.2003.12496.x>
- 563 Myllymäki, H., Valanne, S., Rämet, M., 2014. The *Drosophila* Imd Signaling Pathway. *The*  
564 *Journal of Immunology* 192, 3455–3462. <https://doi.org/10.4049/jimmunol.1303309>
- 565 Neves, J., Sousa-Victor, P., 2020. Regulation of inflammation as an anti-aging intervention.  
566 *The FEBS Journal* 287, 43–52. <https://doi.org/10.1111/febs.15061>
- 567 Neves, J., Zhu, J., Sousa-Victor, P., Konjikusic, M., Riley, R., Chew, S., Qi, Y., Jasper, H., Lamba,  
568 D.A., 2016. Immune modulation by MANF promotes tissue repair and regenerative  
569 success in the retina. *Science* 353, aaf3646. <https://doi.org/10.1126/science.aaf3646>
- 570 Nishide, Y., Kageyama, D., Yokoi, K., Jouraku, A., Tanaka, H., Futahashi, R., Fukatsu, T., 2019.  
571 Functional crosstalk across IMD and Toll pathways: insight into the evolution of  
572 incomplete immune cascades. *Proceedings of the Royal Society B: Biological Sciences*  
573 286, 20182207. <https://doi.org/10.1098/rspb.2018.2207>



- 574 Prakash, A., 2022. Immune regulation of disease tolerance and immune priming in  
575 *Drosophila*. <https://doi.org/10.7488/era/2279>
- 576 Prakash, A., Monteith, K.M., Vale, P.F., 2021. Negative regulation of IMD contributes to  
577 disease tolerance during systemic bacterial infection in *Drosophila* (preprint).  
578 *Evolutionary Biology*. <https://doi.org/10.1101/2021.09.23.461574>
- 579 Ren, C., Webster, P., Finkel, S.E., Tower, J., 2007. Increased Internal and External Bacterial  
580 Load during *Drosophila* Aging without Life-Span Trade-Off. *Cell Metabolism* 6, 144–  
581 152. <https://doi.org/10.1016/j.cmet.2007.06.006>
- 582 Sadd, B.M., Siva-Jothy, M.T., 2006. Self-harm caused by an insect's innate immunity. *Proc. R.*  
583 *Soc. B.* 273, 2571–2574. <https://doi.org/10.1098/rspb.2006.3574>
- 584 Shaw, A.C., Goldstein, D.R., Montgomery, R.R., 2013. Age-dependent dysregulation of  
585 innate immunity. *Nat Rev Immunol* 13, 875–887. <https://doi.org/10.1038/nri3547>
- 586 Siva-Jothy, J.A., Prakash, A., Vasanthakrishnan, R.B., Monteith, K.M., Vale, P.F., 2018. Oral  
587 Bacterial Infection and Shedding in *Drosophila melanogaster*. *JoVE* 57676.  
588 <https://doi.org/10.3791/57676>
- 589 Stout-Delgado, H.W., Du, W., Shirali, A.C., Booth, C.J., Goldstein, D.R., 2009. Aging Promotes  
590 Neutrophil-Induced Mortality by Augmenting IL-17 Production during Viral Infection.  
591 *Cell Host & Microbe* 6, 446–456. <https://doi.org/10.1016/j.chom.2009.09.011>
- 592 Therneau, T., 2015. Mixed Effects Cox Models, in: *Mixed Effects Cox Models*. CRAN  
593 repository.
- 594 Unckless, R.L., Howick, V.M., Lazzaro, B.P., 2016. Convergent Balancing Selection on an  
595 Antimicrobial Peptide in *Drosophila*. *Current Biology* 26, 257–262.  
596 <https://doi.org/10.1016/j.cub.2015.11.063>
- 597 Williams, G.C., 1957. Pleiotropy, Natural Selection, and the Evolution of Senescence.  
598 *Evolution* 11, 398–411. <https://doi.org/10.1111/j.1558-5646.1957.tb02911.x>
- 599 Zerofsky, M., Harel, E., Silverman, N., Tatar, M., 2005. Aging of the innate immune response  
600 in *Drosophila melanogaster*. *Aging Cell* 4, 103–108. [https://doi.org/10.1111/j.1474-  
601 9728.2005.00147.x](https://doi.org/10.1111/j.1474-9728.2005.00147.x)  
602

603 **Figure 1. Infection with *Providencia rettgeri* in multiple AMP-knockouts.** The estimated  
604 hazard ratios calculated from survival curves (160-180 flies/sex/infection treatment/ age-  
605 group/fly line; see Fig. S3, S4) and bacterial load (n= 8-9 replicate groups/sex/treatment/age-  
606 group/fly line) measured at 24-hours after *P. rettgeri* infection across sexes and age-groups.  
607 Hazard ratios for double combination of AMP-knockouts (i.e., group-AB, BC, & AC; see Fig. S1  
608 for details about the fly lines) in males (**A**) and females (**E**). Bacterial loads for double  
609 combination of AMP-knockouts in males (**B**) and females (**F**). Hazard ratios for single  
610 combination of AMP Knockouts (e.g., group- A, B & C) in males (**C**) and females (**G**). Bacterial  
611 load for single combination of compound of AMP-knockouts in males (**D**) and females (**H**). In  
612 panels A, C, E, G, hazard ratios significantly greater than 1 (hazard ratio =1; shown as  
613 horizontal dashed grey lines), indicated by asterisk (\*), suggests higher infection susceptibility  
614 of mutant flies than the iso-*w*<sup>1118</sup> control flies. In panels B, D, F, H, each data point represents  
615 the bacterial load of flies pooled in a group of 6. Mutant fly lines that had significantly  
616 different bacterial load from wild-type iso-*w*<sup>1118</sup> are indicated by asterisks. ns = not significant.  
617 Group A- flies lacking *Defensin*; Group B - flies lacking AMPs such as *Drosocin*, *Diptericins* and  
618 *Attacins*; Group C - flies lacking *Metchnikowin* and *Drosomycin*; Group-A, B and C mutants  
619 were combined to generate flies lacking AMPs either from groups A and B (AB), or A and C  
620 (AC), or B and C (BC).

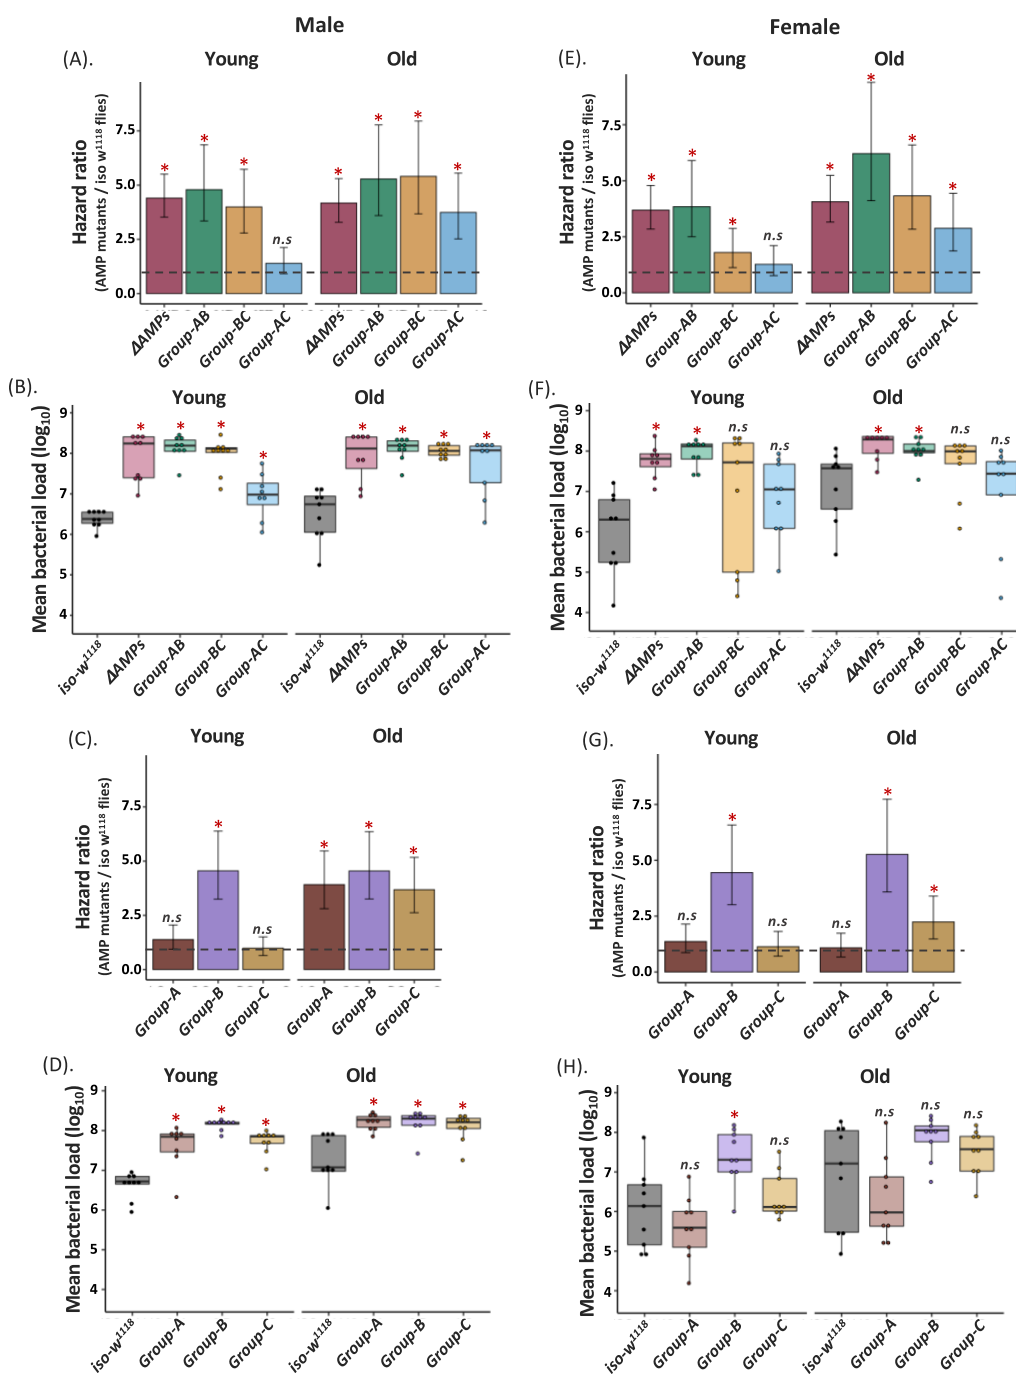

621

622 **Figure. 2. Infection with *Providencia rettgeri* in individual AMP-knockouts.** The estimated  
623 hazard ratios calculated from survival curves (160-180 flies/sex/infection treatment/ age-  
624 group/fly line; see Fig. S3, S4) and bacterial load (n= 8-9 replicate groups/sex/treatment/age-  
625 group/fly line) measured at 24 hours after *P. rettgeri* infection across sexes and age-groups.  
626 Hazard ratios for Imd-responsive single AMP (e.g., *Dpt*, *AttC*, *AttD*, *Dro*; see Fig. S1 for details  
627 about the fly lines) and Att-Dro knockouts in males (**A**) and females (**E**). Bacterial load of Imd-  
628 responsive single AMP and Att-Dro knockouts in males (**B**) and females (**F**). Hazard ratios for  
629 Toll-responsive single AMP knockouts (e.g., *Drs* & *Mtk*) in males (**C**) and females (**G**). Bacterial  
630 loads of Toll-responsive single AMP knockouts in males (**D**) and females (**H**) respectively. In  
631 panels A, C, E, G, hazard ratios significantly greater than 1 (hazard ratio =1; shown as  
632 horizontal dashed grey lines), indicated by asterisk (\*), suggests higher infection susceptibility  
633 of mutant flies than the iso-*w*<sup>1118</sup> control flies. In panels B, D, F, H, each data point represents  
634 the bacterial load of flies pooled in a group of 6. Mutant fly lines that had significantly  
635 different bacterial load from wild-type iso-*w*<sup>1118</sup> are indicated by asterisks (\*). ns = not  
636 significant.

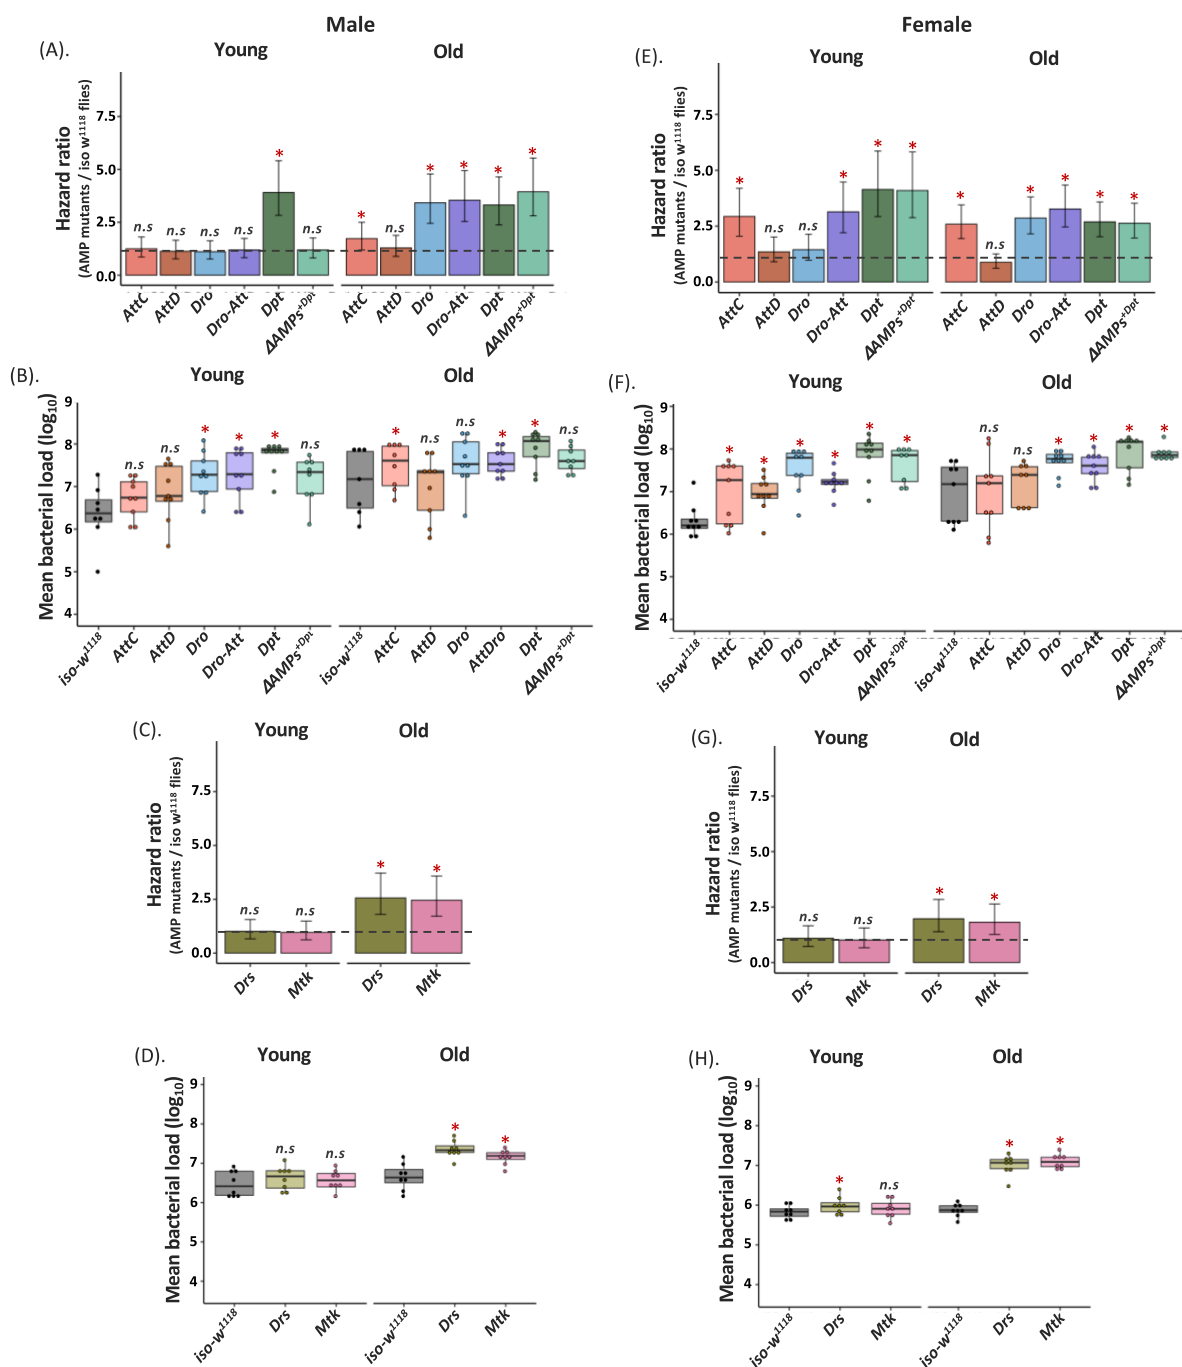

637

638 **Figure 3. Infection with *Pseudomonas entomophila* in multiple AMP-knockouts.** The  
639 estimated hazard ratios calculated from survival curves (180-280 flies/treatment/age-  
640 groups/sex/fly line; see SI Fig. S5, S6) and bacterial load (n= 9-15 replicate  
641 groups/sex/treatment/age-group/fly line) measured at 20-hours after *P. entomophila*  
642 infection across sexes and age-groups. Hazard ratios for double (i.e., group-AB, BC, & AC) and  
643 single combination (i.e., group-A, B, C) of AMP-knockouts in males **(A)** and females **(C)**.  
644 Bacterial loads for double and single combination of AMP-knockouts in males **(B)** and females  
645 **(D)**. In panels A & C hazard ratios significantly greater than 1 (hazard ratio =1; shown as  
646 horizontal dashed grey lines), indicated by asterisk (\*), suggests higher infection susceptibility  
647 of mutant flies than the iso-*w*<sup>1118</sup> control flies. In panels B & D each data point represents the  
648 bacterial load of flies pooled in a group of 6. Mutant fly lines that had significantly different  
649 bacterial load from wild-type iso-*w*<sup>1118</sup> are indicated by asterisks. ns = not significant. See Fig  
650 1 or the main text for the description of different fly groups.

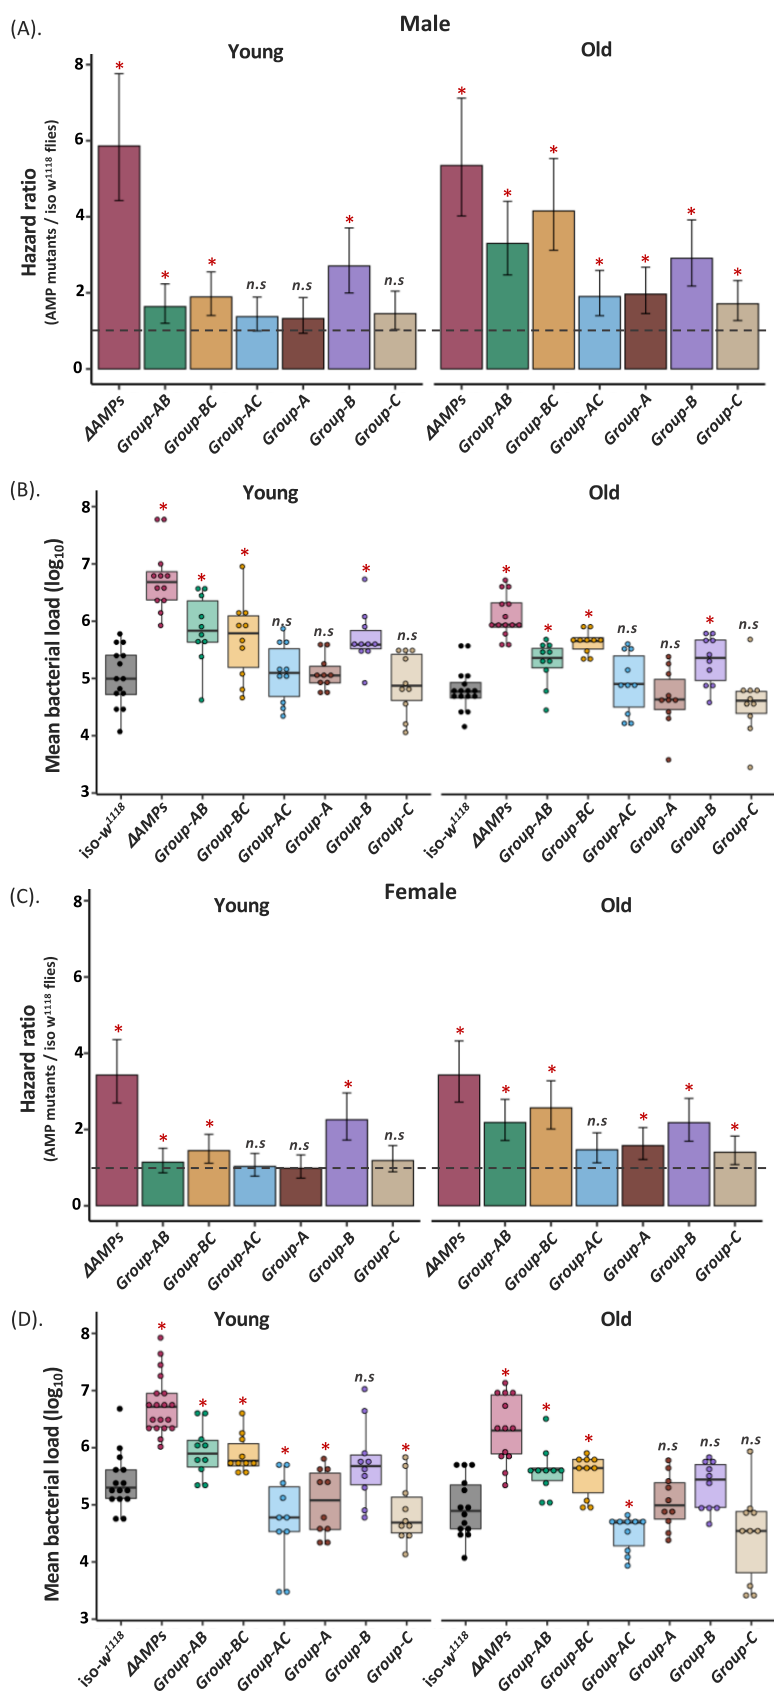

652 **Figure 4. Infection with *Pseudomonas entomophila* in individual AMP-knockouts.** The  
653 estimated hazard ratios calculated from survival curves (180-280 flies/sex/infection  
654 treatment/ age-group/fly line; see SI Fig. S5, S6) and bacterial load (n= 9-15 replicate  
655 groups/sex/treatment/age-group/fly line) measured at 20 hours after *P. entomophila*  
656 infection across sexes and age-groups. Hazard ratios for Imd-responsive single AMP (e.g.,  
657 *AttC*, *AttD*, *Dro*; see Fig. S1 for details about the fly lines) and *Att-Dro* knockouts in males **(A)**  
658 and females **(E)**. Bacterial load of Imd-responsive single AMP and *Att-Dro* knockouts in males  
659 **(B)** and females **(F)**. Hazard ratios for Toll-responsive single AMP knockouts (e.g., *Drs* & *Mtk*)  
660 in males **(C)** and females **(G)**. Bacterial loads of Toll-responsive single AMP knockouts in males  
661 **(D)** and females **(H)** respectively. In panels A, C, E, G, hazard ratios significantly greater than  
662 1 (hazard ratio =1; shown as horizontal dashed grey lines), indicated by asterisk (\*), suggests  
663 higher infection susceptibility of mutant flies than the iso-*w*<sup>1118</sup> control flies. In panels B, D, F,  
664 H, each data point represents the bacterial load of flies pooled in a group of 6. Mutant fly lines  
665 that had significantly different bacterial load from wild-type iso-*w*<sup>1118</sup> are indicated by  
666 asterisks (\*). ns = not significant.  
667



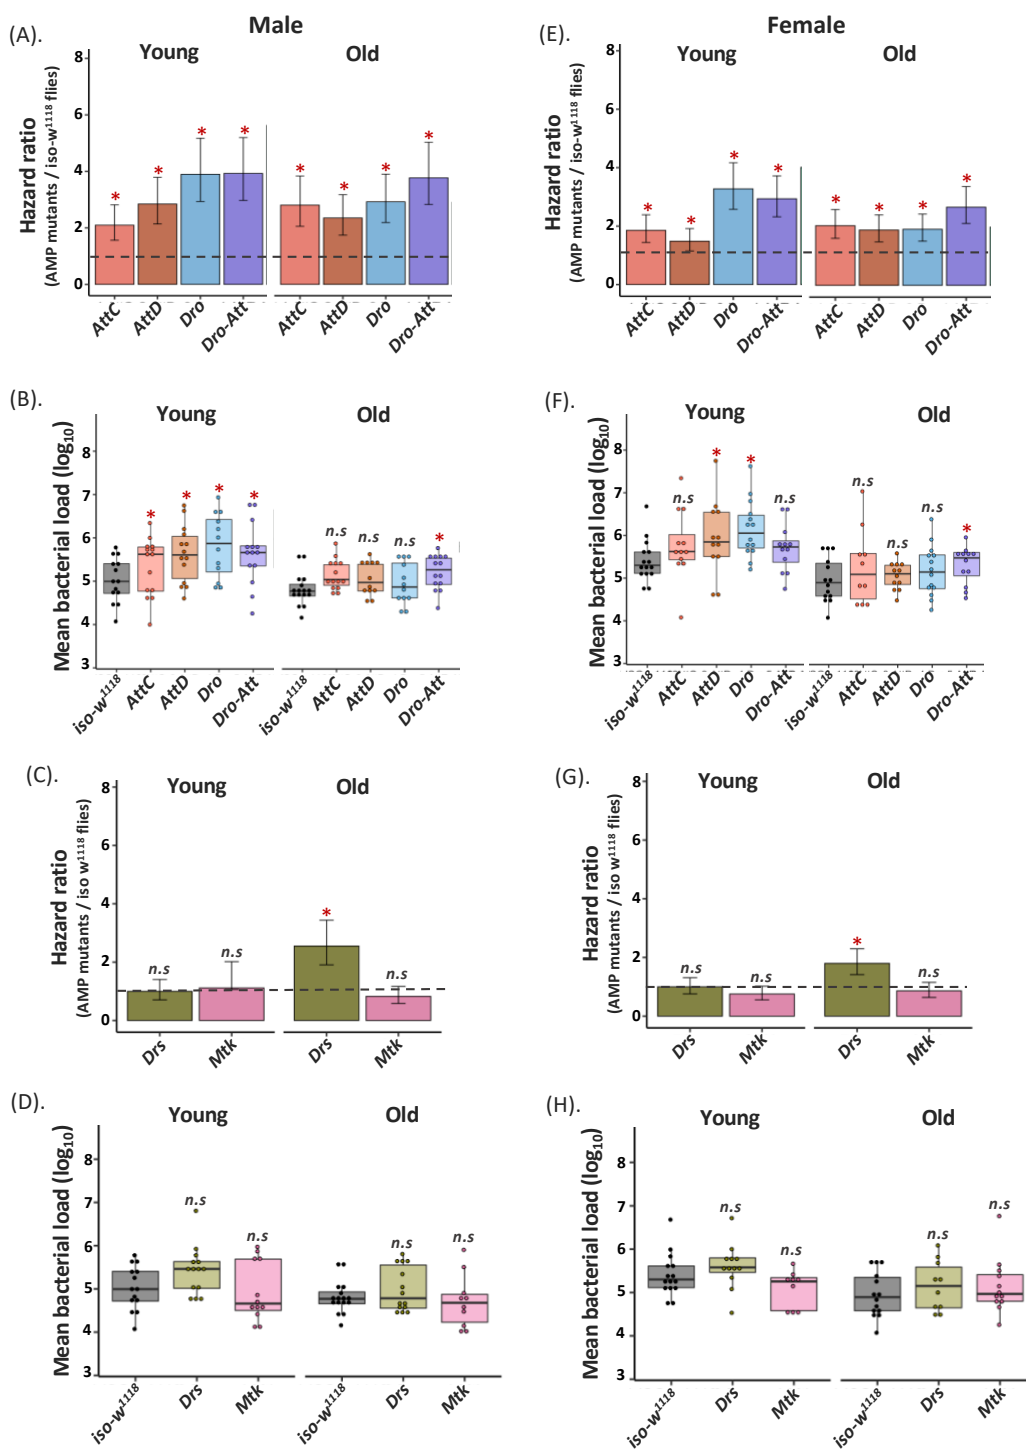

668

669 **Figure 5. Ageing-associated immune dysregulation and immunopathology. (A)** Malpighian  
670 tubule (MT) activity (n = 15 females/infection treatment/age-group), as a proxy for  
671 immunopathological damage, measured at 3-hours after infection with 0.1 OD of *P. rettgeri*.  
672 Statistically significant difference between groups are indicated by asterisk (\*). **(B)** Expression  
673 of positive (*Relish*, *PGRP-LC*) and negative (*Caudal*, *Pirk*) regulators of Imd-pathway across  
674 sexes and age-groups after *P. rettgeri* infection, relative to an internal control *rp49* (n= Total  
675 15-21 flies homogenized in Trizol in a group of 3/Infection treatment/ age-group/ sex-  
676 combination). ns = not significant

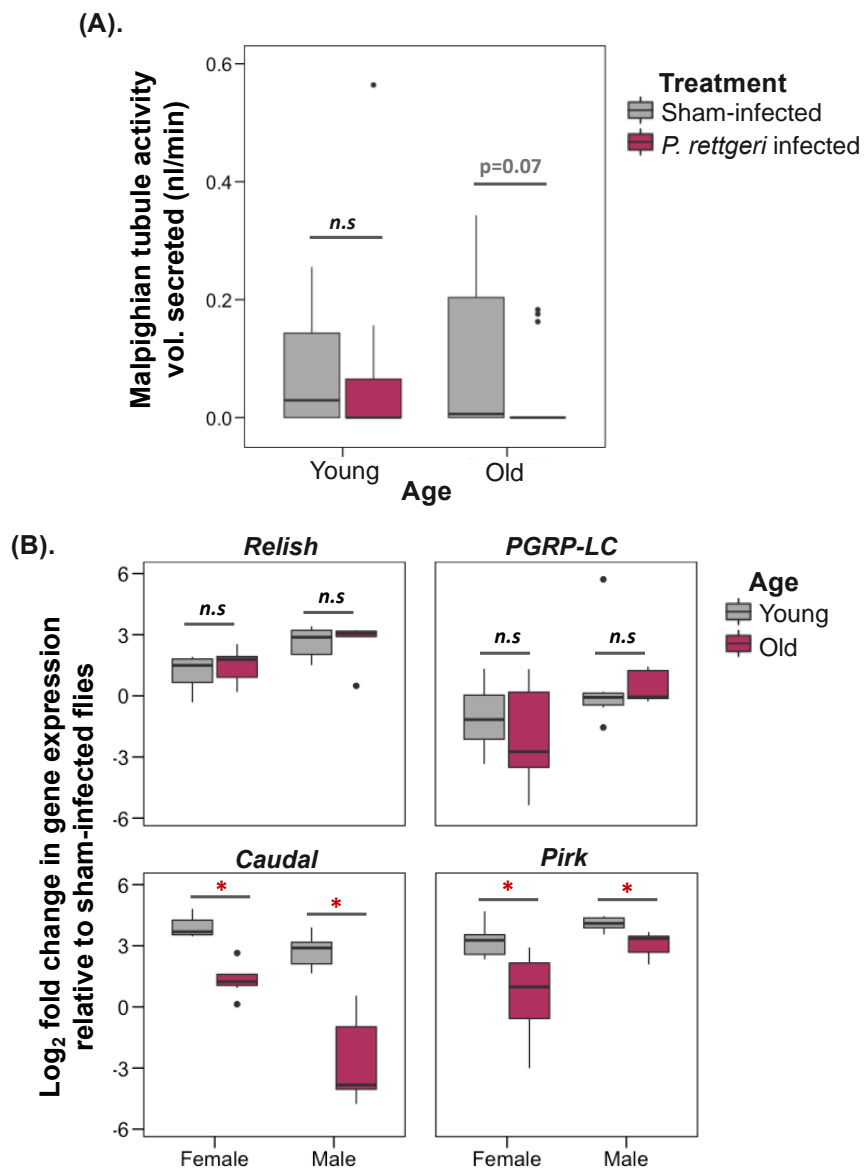

677
